# Supplementary material
Source: Springer Nature journal article supplement (https://www.springermedizin.de/resource/supplementary/12936_2007_467_MOESM3_ESM.pdf/9547512)

----- Malaria ——— Rainfall ——— Maximum T

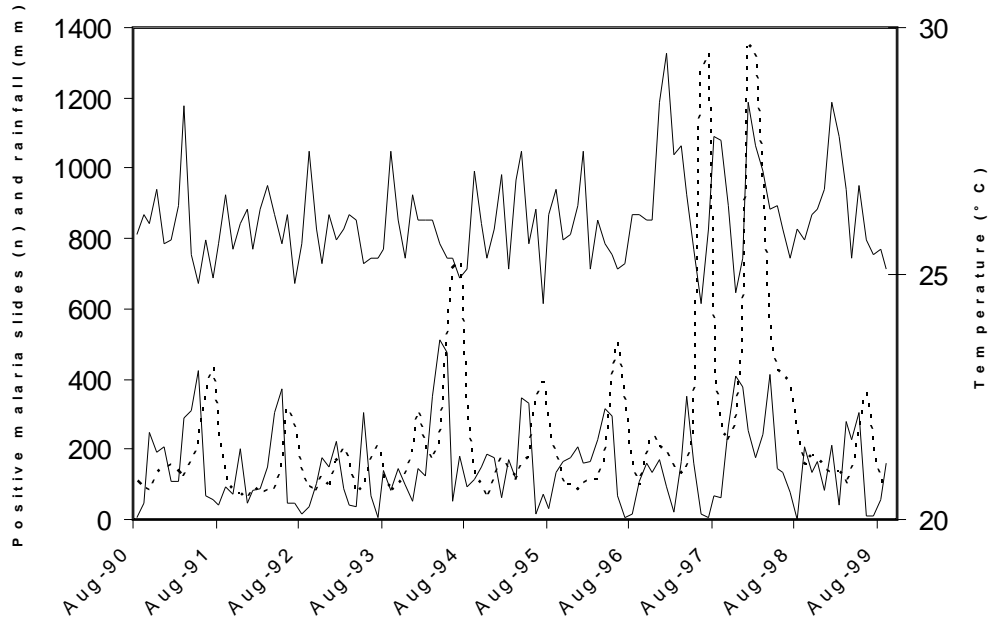

Supplement: MOESM3 [file 9547512]
